# Supplementary material for: Investigation of sponge medium for efficient concurrent tumor treating fields and radiotherapy for glioblastomas
Source: Royal Society of Chemistry journal article supplement (doi:10.1039/d3nr04228f), 2023-01-01
Supplement: d3nr04228f1.pdf [file d3nr04228f1.pdf]

## **Investigation on sponge medium for efficient concurrent tumor treating fields and radiotherapy for glioblastoma**

Jiajun Zheng<sup>1, 2</sup>, Huanfeng Zhu<sup>1</sup>, Wenjie Guo<sup>1</sup>, Chenchen Gao<sup>3</sup>, Jiahao Guo<sup>3</sup>, Li Sun<sup>1</sup>, Geng Xu<sup>1</sup>, Zhi Wang<sup>4</sup>, Baoying Dai<sup>3\*</sup>, Ning Gu<sup>2, 5\*</sup>, and Xia He<sup>1\*</sup>

1 Jiangsu Cancer Hospital, the Affiliated Cancer Hospital of Nanjing Medical University, Jiangsu Institute of Cancer Research, Nanjing 210009, China

2 School of Biomedical Engineering and Informatics, Nanjing Medical University, Nanjing 211166, China

3 State Key Laboratory of Organic Electronics and Information Displays & Institute of Advanced Materials (IAM), Jiangsu Key Laboratory for Biosensors, Jiangsu National Synergetic Innovation Center for Advanced Materials (SICAM), Nanjing University of Posts and Telecommunications, Nanjing 210023, China

4 The First Affiliated Hospital of Anhui Medical University, Nanjing 230022, China

5 Medical School, Nanjing University, Nanjing 210093, China

\* Corresponding Authors

Email: [iambydai@njupt.edu.cn](mailto:iambydai@njupt.edu.cn) (Baoying Dai); [guning@nju.edu.cn](mailto:guning@nju.edu.cn) (Ning Gu); [hexiabm@163.com](mailto:hexiabm@163.com) (Xia He)

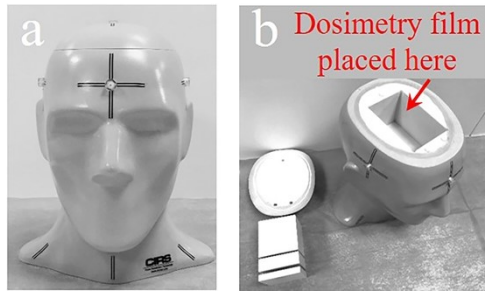

**Fig. S1** Digital pictures of HN-038 with a) dismantled emulation cranium and b) built-in cubes.

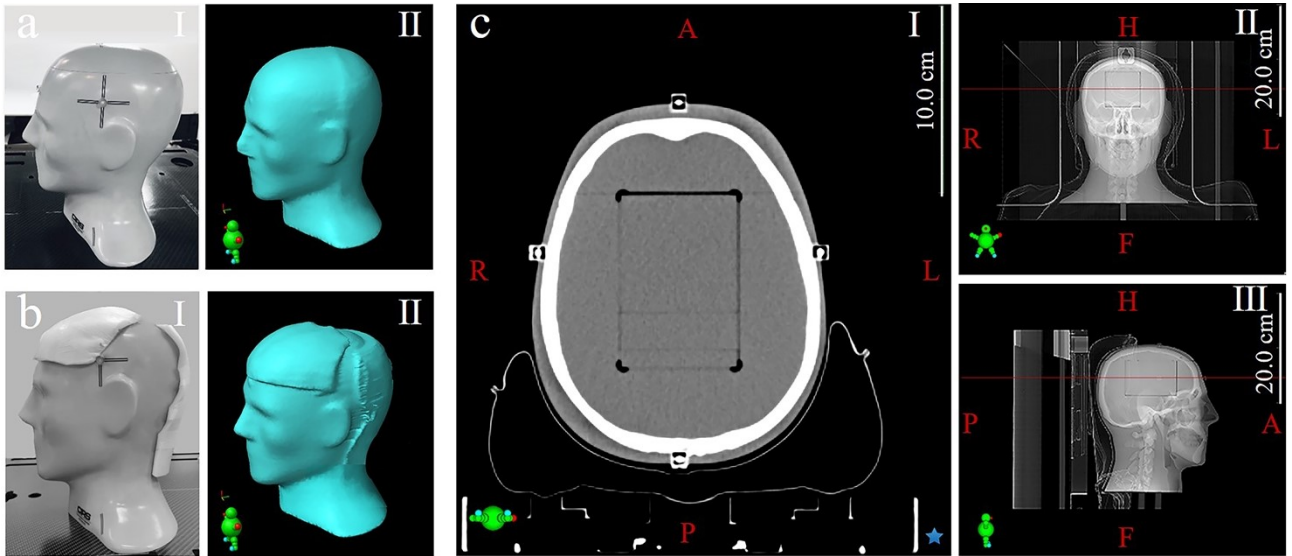

**Fig. S2** Digital pictures of HN-038 (I) and corresponding model diagram (II) in the a) absence and b) presence of sponge medium, respectively. c) Anatomical structure of 731-HN, I) slice of benchmark plane, II) coronal scenography, and III) sagittal scenography.

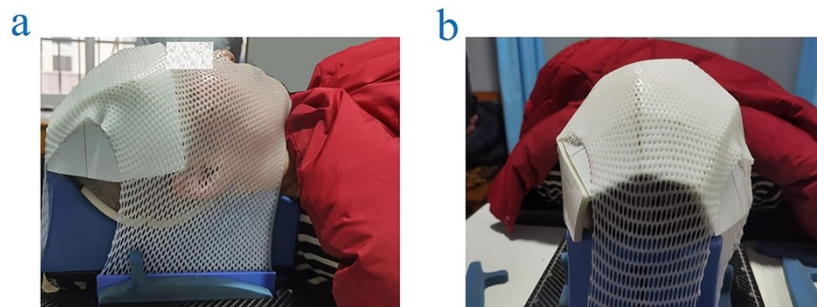

**Fig. S3** Digital pictures of GBM patient covered with sponge medium for CT characterization from a) right and b) top directions, respectively.

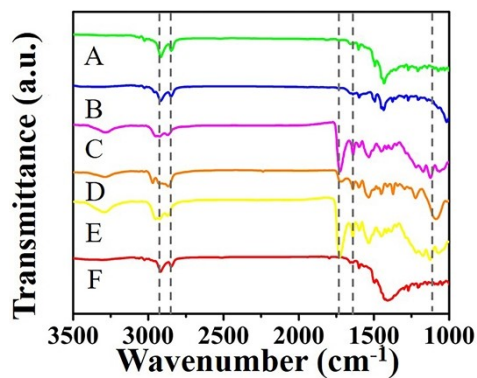

**Fig. S4** FT-IR spectra of reference sponge sample A and candidate sponge samples B, C, D, E, and F.

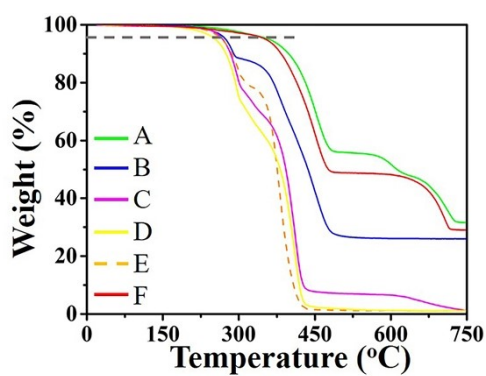

**Fig. S5** TGA curves of reference sponge sample A and candidate sponge samples B, C, D, E, and F.

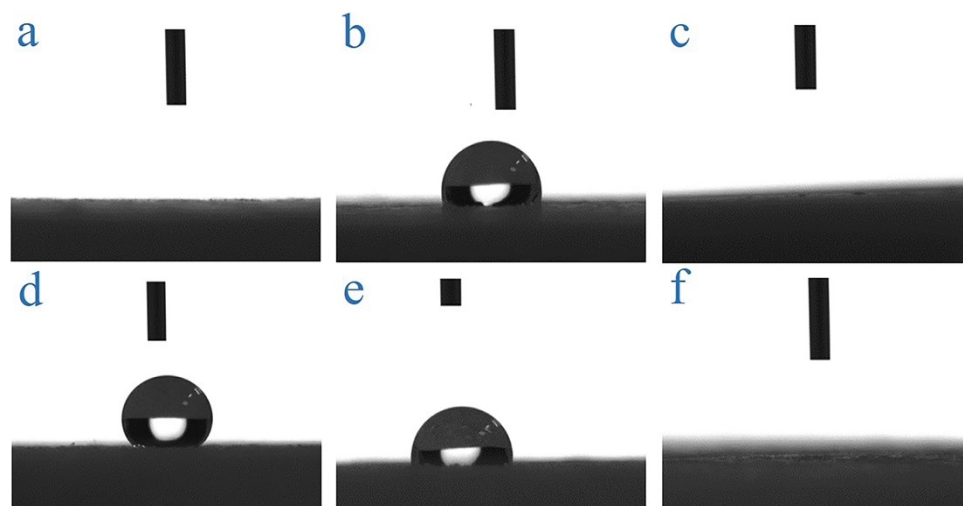

**Fig. S6** Contact angles of a) reference sponge sample A, and candidate sponge samples b) B, c) C, d) D, e) E and f) F, respectively.

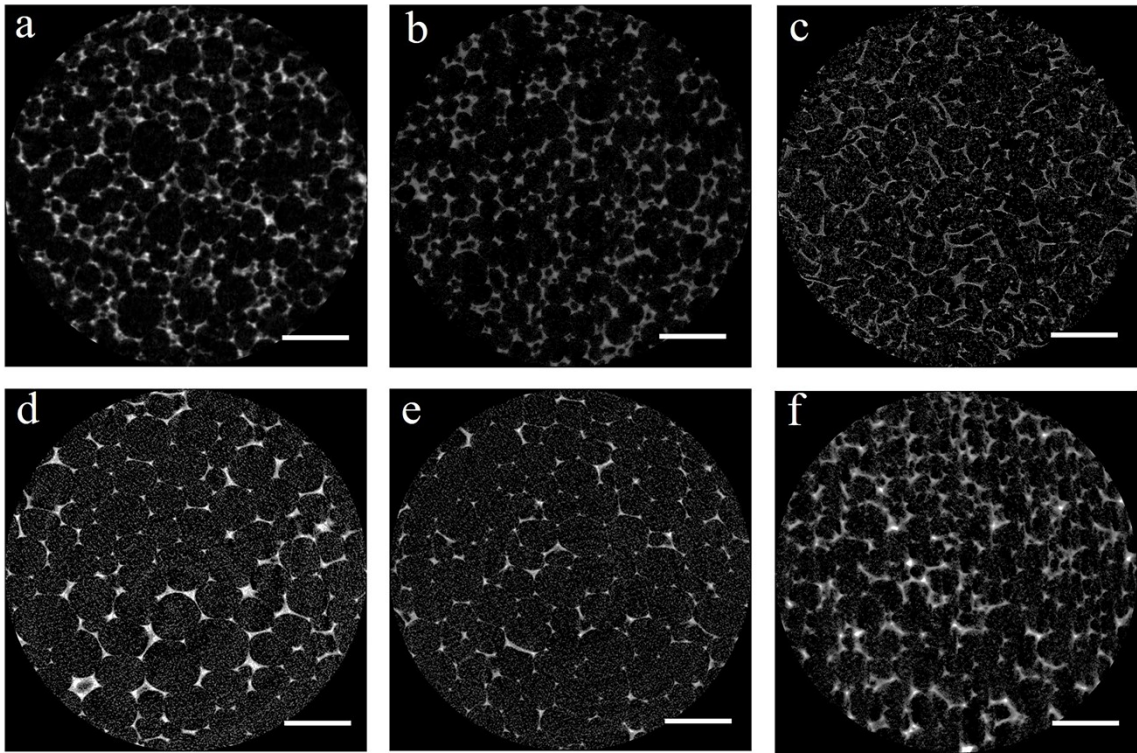

**Fig. S7** Re-built 3D micro-CT images of a) reference sponge sample A, and candidate sponge samples b) B, c) C, d) D, e) E, and f) F, respectively. The scale bar is 500  $\mu m$ .
